# Supplementary material
Source: publisher figshare collection journal article supplement (https://acs.figshare.com/ndownloader/files/4663924)
Supplement: Supplementary file 1 [file 4663924]

***Recent Reviews. 87***

compiled by Veronica M. Cornel

## Department of Chemistry, Reedley College, 995 Reed Ave, Reedley, California 93654

Reviews are listed in order of appearance in the sources indicated. In multidisciplinary review journals, only those reviews which fall within the scope of this Journal are included. Sources are listed alphabetically in three categories: regularly issued review journals and series volumes, contributed volumes, and other monographs. Titles are numbered serially, and these numbers are used for reference in the index.

Major English-language sources of critical reviews are covered. Encyclopedic treatises, annual surveys such as *Specialist Periodical Reports*, and compilations of symposia proceedings are omitted.

This installment of Recent Reviews covers principally the middle part of the 2007 literature. Previous installment: *J. Org. Chem*.**2007**, 72(20), 7809-16.

**Supporting Information Available:** A file containing this Recent Review compilation in Microsoft Word and the data in plain text that can be imported into Endnote (using Refer style) and Reference Manager databases. This material is available free of charge via the Internet at http://pubs.acs.org.

**Regularly Issued Journals and Series Volumes**

**Accounts of Chemical Research**

**1.** Maulide, N.; Vanherck, J.-C.; Gautier, A.; Marko, I. E. Mild and Neutral Deprotections Catalyzed by Cerium(IV) Ammonium Nitrate.**2007**, *40*(6), 381-92.

**2.** Weng, Z.; Teo, S.; Hor, T. S. A. Metal Unsaturation and Ligand Hemilability in Suzuki Coupling.**2007**, *40*(8), 676-84.

**3.** Miyata, M.; Tohnai, N.; Hisaki, I. Crystalline Host-Guest Assemblies of Steroidal and Related Molecules: Diversity, Hierarchy, and Supramolecular Chirality.**2007**, *40*(8), 694-702.

**4.** Stevenson, C. D. Annulenylenes, Annulynes, and Annulenes.**2007**, *40*(8), 703-11.

**5.** Waterman, R.; Hayes, P. G.; Tilley, T. D. Synthetic Development and Chemical Reactivity of Transition-Metal Silylene Complexes.**2007**, *40*(8), 712-9.

**6.** Moakes, G.; Janata, J. Slow Solvation Dynamics of a Water-Nitrobenzene System.**2007**, *40*(8), 720-8.

**7.** Vogel, P.; Turks, M.; Bouchez, L.; Markovic, D.; Varela-Alvarez, A.; Sordo, J. A. New Organic Chemistry of Sulfur Dioxide.**2007**, *40*(10), 931-42.

**8.** Juaristi, E.; Cuevas, G. Manifestations of Stereoelectronic Interactions in 1*J*C-H One-Bond Coupling Constants.**2007**, *40*(10), 961-70.

**9.** Rayabarapu, D. K.; Cheng, C.-H. New Catalytic Reactions of Oxa- and Azabicyclic Alkenes.**2007**, *40*(10), 971-983.

**10.** Bleeke, J. R. Aromatic Iridacycles.**2007**, *40*(10), 1035-47.

**11.** Ishihara, K.; Fushimi, M.; Akakura, M. Rational Design of Minimal Artificial Diels-Alderases Based on the Copper(II) Cation-Aromatic  Attractive Interaction.**2007**, *40*(10), 1049-55.

**Angewandte Chemie, International Edition in English**

**12.** Marion, N.; Diez-Gonzalez, S.; Nolan, S. P. N-Heterocyclic Carbenes as Organocatalysts.**2007**, *46*(17), 2988-3000.

**13.** Ohki, Y.; Fryzuk, M. D. Dinitrogen Activation by Group 4 Metal Complexes.**2007**, *46*(18), 3180-3.

**14.** Willis, M. C. Palladium-Catalyzed Coupling of Ammonia and Hydroxide with Aryl Halides: The Direct Synthesis of Primary Anilines and Phenols.**2007**, *46*(19), 3402-4.

**15.** Kunz, D. Synthetic Routes to N-Heterocyclic Carbene Complexes: Pyridine-Carbene Tautomerizations.**2007**, *46*(19), 3405-8.

**16.** Fuerstner, A.; Davies, P. W. Catalytic Carbophilic Activation: Catalysis by Platinum and Gold  Acids.**2007**, *46*(19), 3410-49.

**17.** Mihovilovic, M. D.; Stanetty, P. Metal-assisted Multicomponent Reactions Involving Carbon Monoxide - Towards Heterocycle Synthesis.**2007**, *46*(20), 3612-5.

**18.** Butenschoen, H. A New Oxocarbon C12O6 via Highly Strained Benzyne Intermediates.**2007**, *46*(22), 4012-4.

**19.** Chianese, A. R.; Lee, S. J.; Gagne, M. R. Electrophilic Activation of Alkenes by Platinum(II): So Much More Than a Slow Version of Palladium(II).**2007**, *46*(22), 4042-59.

**20.** Schreiner, P. R. Relative Energy Computations with Approximate Density Functional Theory - A Caveat!**2007**, *46*(23), 4217-9.

**21.** Ritch, J. S.; Chivers, T. Silicon Analogues of Crown Ethers and Cryptands: A New Chapter in Host-Guest Chemistry?**2007**, *46*(25), 4610-3.

**22.** Masson, G.; Housseman, C.; Zhu, J. The Enantioselective Morita-Baylis-Hillman Reaction and its Aza Counterpart.**2007**, *46*(25), 4614-28.

**23.** Welzel, P. A Long Research Story Culminates in the First Total Synthesis of Moenomycin A.**2007**, *46*(26), 4825-9.

**24.** Herbert, D. E.; Mayer, U. F. J.; Manners, I. Strained Metallocenophanes and Related Organometallic Rings Containing -Hydrocarbon Ligands and Transition-Metal Centers.**2007**, *46*(27), 5060-81.

**25.** Korth, H.-G. Carbon Radicals of Low Reactivity Against Oxygen: Radically Different Antioxidants.**2007**, *46*(28), 5274-6.

**26.** Cravotto, G.; Cintas, P. Forcing and Controlling Chemical Reactions with Ultrasound.**2007**, *46*(29), 5476-8.

**27.** Steven, A.; Overman, L. E. Total Synthesis of Complex Cyclotryptamine Alkaloids: Stereocontrolled Construction of Quaternary Carbon Stereocenters.**2007**, *46*(29), 5488-508.

**28.** Gademann, K.; Bonazzi, S. Total Synthesis of Complex Cyanobacterial Alkaloids Without Using Protecting Groups.**2007**, *46*(30), 5656-8.

**29.** Schmuck, C. Guest Encapsulation Within Self-Assembled Molecular Containers.**2007**, *46*(31), 5830-3.

**30.** Ludwig, R.; Kragl, U. Do We Understand the Volatility of Ionic Ligands?**2007**, *46*(35), 6582-4.

**Australian Journal of Chemistry**

**31.** Wheate, N. J. Cucurbit[n]uril: A New Molecule in Host-Guest Chemistry. **2006**, *59*(5), 354.

**32.** Zard, S. Z. The Genesis of the Reversible Radical Addition-Fragmentation-Transfer of Thiocarbonylthio Derivatives from the Barton-Mccombie Deoxygenation: a Brief Account and Some Mechanistic Observations. **2006**, *59*(10), 663-8.

**Canadian Journal of Chemistry**

**33.** Vederas, J. C. 2005 Alfred Bader Award Lecture. Diaminopimelate and Lysine Biosynthesis - An Antimicrobial Target in Bacteria.**2006**, *84*(10), 1197-207.

**34.** Kuehl, O. The Natural Bite Angle - Seen From a Ligand's Point of View.**2007**, *85*(3), 230-8.

**35.** Zon, G. Commercialization of Automated RNA Synthesis - Twenty Years On.**2007**, *85*(4), 257-60.

**Chemical Reviews**

**36.** Lopez Ortiz, F.; Iglesias, M. J.; Fernandez, I.; Andujar Sanchez, C. M.; Ruiz Gomez, G. Nucleophilic Dearomatizing (DNAr) Reactions of Aromatic C,H-Systems. A Mature Paradigm in Organic Synthesis. **2007**, *107*(5), 1580-691.

**37.** Gibson, V. C.; Redshaw, C.; Solan, G. A. Bis(imino)pyridines: Surprisingly Reactive Ligands and a Gateway to New Families of Catalysts.**2007**, *107*(5), 1745-76.

**38.** Arjona, O.; Gomez, A. M.; Lopez, J. C.; Plumet, J. Synthesis and Conformational and Biological Aspects of Carbasugars.**2007**, *107*(5), 1919-2036.

**39.** Akhrem, I.; Orlinkov, A. Polyhalomethanes Combined with Lewis Acids in Alkane Chemistry.**2007**, *107*(5), 2037-79.

**40.** Singh, G. S.; D'Hooghe, M.; De Kimpe, N. Synthesis and Reactivity of C-Heteroatom-Substituted Aziridines.**2007**, *107*(5), 2080-135.

**41.** Walsh, P. J.; Li, H.; de Parrodi, C. A. A Green Chemistry Approach to Asymmetric Catalysis: Solvent-Free and Highly Concentrated Reactions.**2007**, *107*(6), 2503-45.

**42.** Parvulescu, V. I.; Hardacre, C. Catalysis in Ionic Liquids.**2007**, *107*(6), 2615-65.

**43.** Fagnoni, M.; Dondi, D.; Ravelli, D.; Albini, A. Photocatalysis for the Formation of the C-C Bond.**2007**, *107*(6), 2725-56.

**44.** Kar, M.; Basak, A. Design, Synthesis, and Biological Activity of Unnatural Enediynes and Related Analogues Equipped with pH-Dependent or Phototriggering Devices.**2007**, *107*(7), 2861-90.

**45.** Rubin, M.; Rubina, M.; Gevorgyan, V. Transition Metal Chemistry of Cyclopropenes and Cyclopropanes.**2007**, *107*(7), 3117-79.

**46.** Hashmi, A. S. K. Gold-Catalyzed Organic Reactions.**2007**, *107*(7), 3180-211.

**47.** Sawwan, N.; Greer, A. Rather Exotic Types of Cyclic Peroxides: Heteroatom Dioxiranes.**2007**, *107*(7), 3247-85.

**48.** Das, S.; Chandrasekhar, S.; Yadav, J. S.; Gree, R. Recent Developments in the Synthesis of Prostaglandins and Analogues.**2007**, *107*(7), 3286-337.

**49.** Gelalcha, F. G. Heterocyclic Hydroperoxides in Selective Oxidations.**2007**, *107*(7), 3338-61.

**50.** Bifulco, G.; Dambruoso, P.; Gomez-Paloma, L.; Riccio, R. Determination of Relative Configuration in Organic Compounds by NMR Spectroscopy and Computational Methods.**2007**, *107*(9), 3744-79.

**51.** Marcus, Y. Gibbs Energies of Transfer of Anions from Water to Mixed Aqueous Organic Solvents.**2007**, *107*(9), 3880-97.

**Chemical Society Reviews**

**52.** Berova, N.; Di Bari, L.; Pescitelli, G. Application of Electronic Circular Dichroism in Configurational and Conformational Analysis of Organic Compounds.**2007**, *36*(6), 914-31.

**53.** Perez-Garcia, L.; Amabilino, D. B. Spontaneous Resolution, Whence and Whither: From Enantiomorphic Solids to Chiral Liquid Crystals, Monolayers and Macro- and Supra-Molecular Polymers and Assemblies.**2007**, *36*(6), 941-67.

**54.** Fairlamb, I. J. S. Regioselective (Site-selective) Functionalization of Unsaturated Halogenated Nitrogen, Oxygen and Sulfur Heterocycles by Pd-Catalyzed Cross-Couplings and Direct Arylation Processes.**2007**, *36*(7), 1036-45.

**55.** Schnuerch, M.; Spina, M.; Khan, A. F.; Mihovilovic, M. D.; Stanetty, P. Halogen Dance Reactions - A Review.**2007**, *36*(7), 1046-57.

**56.** Campeau, L.-C.; Fagnou, K. Applications of and Alternatives to -Electron-Deficient Azine Organometallics in Metal Catalyzed Cross-Coupling Reactions.**2007**, *36*(7), 1058-68.

**57.** Campos, K. R. Direct sp3 C-H Bond Activation Adjacent to Nitrogen in Heterocycles.**2007**, *36*(7), 1069-84.

**58.** Heller, B.; Hapke, M. The Fascinating Construction of Pyridine Ring Systems by Transition Metal-Catalysed [2+2+2] Cycloaddition Reactions.**2007**, *36*(7), 1085-94.

**59.** D'Souza, D. M.; Mueller, T. J. J. Multi-Component Syntheses of Heterocycles by Transition-Metal Catalysis.**2007**, *36*(7), 1095-108.

**60.** Davies, H. M. L.; Hedley, S. J. Intermolecular Reactions of Electron-Rich Heterocycles with Copper and Rhodium Carbenoids.**2007**, *36*(7), 1109-19.

**61.** Song, J. J.; Reeves, J. T.; Gallou, F.; Tan, Z.; Yee, N. K.; Senanayake, C. H. Organometallic Methods for the Synthesis and Functionalization of Azaindoles.**2007**, *36*(7), 1120-32.

**62.** Nishiyama, H. Synthesis and Use of Bisoxazolinyl-Phenyl Pincers.**2007**, *36*(7), 1133-41.

**63.** Minatti, A.; Muniz, K. Intramolecular Aminopalladation of Alkenes as a Key Step to Pyrrolidines and Related Heterocycles.**2007**, *36*(7), 1142-52.

**64.** Chemler, S. R.; Fuller, P. H. Heterocycle Synthesis by Copper Facilitated Addition of Heteroatoms to Alkenes, Alkynes and Arenes.**2007**, *36*(7), 1153-60.

**65.** Schlosser, M.; Mongin, F. Pyridine Elaboration through Organometallic Intermediates: Regiochemical Control and Completeness.**2007**, *36*(7), 1161-72.

**66.** Seregin, I. V.; Gevorgyan, V. Direct Transition Metal-Catalyzed Functionalization of Heteroaromatic Compounds.**2007**, *36*(7), 1173-1193.

**67.** Wilson, R. M.; Danishefsky, S. J. Applications of Total Synthesis Toward the Discovery of Clinically Useful Anticancer Agents.**2007**, *36*(8), 1207-26.

**68.** Bennett, C. S.; Wong, C.-H. Chemoenzymatic Approaches to Glycoprotein Synthesis.**2007**, *36*(8), 1227-38.

**69.** Georgiev, I. G.; MacGillivray, L. R. Metal-Mediated Reactivity in the Organic Solid State: From Self-Assembled Complexes to Metal-Organic Frameworks.**2007**, *36*(8), 1239-48.

**70.** Moses, J. E.; Moorhouse, A. D. The Growing Applications of Click Chemistry.**2007**, *36*(8), 1249-62.

**71.** Gazit, E. Self-Assembled Peptide Nanostructures: The Design of Molecular Building Blocks and Their Technological Utilization.**2007**, *36*(8), 1263-9.

**72.** Gomez, R.; Seoane, C.; Segura, J. L. The First Two Decades of a Versatile Electron Acceptor Building Block: 11,11,12,12-Tetracyano-9,10-Anthraquinodimethane (TCAQ).**2007**, *36*(8), 1305-22.

**73.** Wang, C.; Xi, Z. Co-operative Effect of Lewis Acids with Transition Metals for Organic Synthesis.**2007**, *36*(9), 1395-406.

**74.** Severin, R.; Doye, S. The Catalytic Hydroamination of Alkynes.**2007**, *36*(9), 1407-20.

**75.** Fisk, J. S.; Mosey, R. A.; Tepe, J. J. The Diverse Chemistry of Oxazol-5-(4H)-ones.**2007**, *36*(9), 1432-40.

**Chemistry - A European Journal**

**76.** Macias-Ruvalcaba, N. A.; Evans, D. H. Electron Transfer and Structural Change: Distinguishing Concerted and Two-Step Processes.**2007**, *13*(16), 4386-95.

**77.** Brik, A.; Wong, C.-H. Sugar-assisted Ligation for the Synthesis of Glycopeptides.**2007**, *13*(20), 5670-5.

**78.** Westerhausen, M.; Gaertner, M.; Fischer, R.; Langer, J.; Yu, L.; Reiher, M. Heavy Grignard Reagents: Challenges and Possibilities of Aryl Alkaline Earth Metal Compounds.**2007**, *13*(22), 6292-306.

**79.** Yudin, A. K.; Hili, R. Overcoming the Demons of Protecting Groups with Amphoteric Molecules.**2007**, *13*(23), 6538-42.

**80.** Opsitnick, E.; Lee, D. Two-Dimensional Electronic Conjugation: Statics and Dynamics at Structural Domains Beyond Molecular Wires.**2007**, *13*(25), 7040-9.

**CHEMTRACTS: Organic Chemistry**

**81.** Paquette, L. A. Synthesis and Unprecedented Reactivity Characteristics of Unsaturated Bridgehead Sultams.**2006**, *19*(1), 1-10.

**82.** Lang, S. Efficient Two-Pot Procedure for the Preparation of Anilines from Readily Available Aldehydes.**2006**, *19*(1), 17-22.

**83.** Kellogg, R. M. Multicomponent Reactions with Ketene Imine Intermediates Formed from the Reaction of Sulfonyl Azides with Acetylenes.**2006**, *19*(1), 31-7.

**84.** Behera, M. Recent Asymmetric Synthesis of the Anti-Influenza Neuraminidase Inhibitor Oseltamivir (Tamiflu).**2006**, *19*(1), 38-44.

**85.** Sieck, S. R.; Hanson, P. R. Ring-Closing Metathesis of Sterically and Electronically Demanding Systems.**2006**, *19*(7), 280-94.

**Coordination Chemistry Reviews**

**86.** Anzenbacher, P.; Nishiyabu, R.; Palacios, M. A. N-Confused Calix[4]pyrroles.**2006**, *250*(23+24), 2929-38.

**87.** Yamaguchi, Y.; Ding, W.; Sanderson, C. T.; Borden, M. L.; Morgan, M. J.; Kutal, C. Electronic Structure, Spectroscopy, and Photochemistry of Group 8 Metallocenes.**2007**, *251*(3+4), 515-24.

**88.** Arnold, P. L.; Pearson, S. Abnormal N-Heterocyclic Carbenes.**2007**, *251*(5+6), 596-609.

**89.** Pugh, D.; Danopoulos, A. A. Metal Complexes with 'Pincer'-type Ligands Incorporating N-Heterocyclic Carbene Functionalities.**2007**, *251*(5+6), 610-41.

**90.** Lin, I. J. B.; Vasam, C. S. Preparation and Application of N-Heterocyclic Carbene Complexes of Ag(I).**2007**, *251*(5+6), 642-70.

**91.** Colacino, E.; Martinez, J.; Lamaty, F. Preparation of NHC-Ruthenium Complexes and Their Catalytic Activity in Metathesis Reaction.**2007**, *251*(5+6), 726-64.

**92.** Esteruelas, M. A.; Lopez, A. M.; Olivan, M. Osmium-Carbon Double Bonds: Formation and Reactions.**2007**, *251*(5+6), 795-840.

**93.** Mata, J. A.; Poyatos, M.; Peris, E. Structural and Catalytic Properties of Chelating Bis- and Tris-N-Heterocyclic Carbenes.**2007**, *251*(5+6), 841-59.

**94.** Diez-Gonzalez, S.; Nolan, S. P. Stereoelectronic Parameters Associated with N-Heterocyclic Carbene (NHC) Ligands: A Quest for Understanding.**2007**, *251*(5+6), 874-83.

**95.** Ellis, B. D.; Macdonald, C. L. B. Stable Compounds Containing Heavier Group 15 Elements in the +1 Oxidation State.**2007**, *251*(7+8), 936-73.

**96.** Herndon, J. W. The Chemistry of the Carbon-Transition Metal Double and Triple Bond: Annual Survey Covering the Year 2005.**2007**, *251*(9+10), 1158-258.

**97.** Sivaramakrishna, A.; Clayton, H. S.; Kaschula, C.; Moss, J. R. Transition Metal-Alkenyl Complexes [M-(CH2)nCH=CH2, n ≥ 2]: Synthesis, Structure, Reactivity and Applications.**2007**, *251*(9+10), 1294-308.

**Current Organic Chemistry**

**98.** Szilagyi, L.; Varela, O. Non-Conventional Glycosidic Linkages: Syntheses and Structures of Thiooligosaccharides and Carbohydrates with Three-Bond Glycosidic Connections.**2006**, *10*(14), 1745-70.

**99.** Drabowicz, J.; Kudelska, W.; Lopusinski, A.; Zajac, A. The Chemistry of Phosphinic and Phosphinous Acid Derivatives Containing t-Butyl Group as a Single Bulky Substituent: Synthetic, Mechanistic and Stereochemical Aspects.**2007**, *11*(1), 3-15.

**100.** Sasaki, S.; Yoshifuji, M. Synthesis, Structure and Properties of Crowded Triarylphosphines.**2007**, *11*(1), 17-31.

**101.** Bansal, R. K.; Gupta, N.; Kumawat, S. K. Recent Advances in the Chemistry of Anellated Azaphospholes.**2007**, *11*(1), 33-47.

**102.** Zablocka, M.; Majoral, J.-P. Synthesis of Phosphorus Ligands from Zirconium Reagents. A Useful Approach.**2007**, *11*(1), 49-60.

**103.** Holz, J.; Gensow, M. N.; Zayas, O.; Boerner, A. Synthesis of Chiral Heterocyclic Phosphines for Application in Asymmetric Catalysis.**2007**, *11*(1), 61-106.

**104.** Keglevich, G.; Baan, Z.; Hermecz, I.; Novak, T.; Odinets, I. L. The Phosphorus Aspects of Green Chemistry: The Use of Quaternary Phosphonium Salts and 1,3-Dialkylimidazolium Hexafluorophosphates in Organic Synthesis.**2007**, *11*(1), 107-26.

**105.** Ferreira, V. F. Synthesis of Heterocyclic Compounds by Carbenoid Transfer Reactions.**2007**, *11*(2), 177-93.

**106.** Musilek, K.; Kuca, K.; Jun, D.; Dolezal, M. Progress in Synthesis of New Acetylcholinesterase Reactivators During the Period 1990-2004.**2007**, *11*(2), 229-38.

**107.** Wang, X.; Liang, M.; Zhang, J.; Wang, Y. Selective Hydrogenation of Aromatic Chloronitro Compounds.**2007**, *11*(3), 299-314.

**108.** Toth, G. K.; Kele, Z.; Varadi, G. Phosphopeptides - Chemical Synthesis, Analysis, Outlook and Limitations.**2007**, *11*(5), 409-26.

**109.** Feske, B. D. Bestatin: Three Decades of Synthetic Strategies.**2007**, *11*(5), 483-96.

**110.** Perdih, A.; Dolenc, M. S. Recent Advances in the Synthesis of Unnatural -Amino Acids.**2007**, *11*(9), 801-32.

**111.** Madkour, H. M. F.; Elgazwy, A. S. H. Utilities of Some Carbon Nucleophiles in Heterocyclic Synthesis.**2007**, *11*(10), 853-908.

**112.** Pastor, I. M.; Yus, M. The Prins Reaction: Advances and Applications.**2007**, *11*(10), 925-57.

**113.** Chaturvedi, D.; Ray, S. Versatile Use of Carbon Dioxide in Synthesis of Organic Carbamates.**2007**, *11*(11), 987-98.

**Current Organic Synthesis**

**114.** Murphy, P. V.; Dunne, J. L. Syntheses of Peptidomimetics Based on Pyranose and Poly-Hydroxylated Piperidine Scaffolds.**2006**, *3*(4), 403-37.

**115.** Koketsu, M.; Ishihara, H. Synthesis and Applications of Chalcogenoamide: Thio-, Seleno- and Telluroamides.**2007**, *4*(1), 15-29.

**116.** Honaker, M. T.; Hovland, J. M.; Salvatore, R. N. The Synthesis of Tertiary and Secondary Phosphines and Their Applications in Organic Synthesis.**2007**, *4*(1), 31-45.

**117.** Zappia, G.; Gacs-Baitz, E.; Delle Monache, G.; Misiti, D.; Nevola, L.; Botta, B. Oxazolidin-2-one Ring, A Popular Framework in Synthetic Organic Chemistry: Part 1. The Construction of the Oxazolidin-2-One Ring.**2007**, *4*(1), 81-135.

**118.** Hua, R.; Jiang, J.-L. Recent Development of Rhenium-Catalyzed Organic Synthesis.**2007**, *4*(2), 151-74.

**119.** Patil, S.; Patil, R. Synthesis and Functionalization of Indoles Through Rhodium-Catalyzed Reactions.**2007**, *4*(2), 201-22.

**120.** Chaturvedi, D.; Mishra, N.; Mishra, V. Various Approaches for the Synthesis of Organic Carbamates.**2007**, *4*(3), 308-20.

**121.** Demir, A. S.; Emrullahoglu, M. Manganese(III) Acetate: A Versatile Reagent in Organic Chemistry.**2007**, *4*(3), 321-51.

**European Journal of Organic Chemistry**

**122.** Bartoli, G.; Locatelli, M.; Melchiorre, P.; Sambri, L. Taking up the Cudgels for Perchlorates: Uses and Applications in Organic Reactions Under Mild Conditions.**2007**, (13), 2037-49.

**123.** Langer, P. Synthesis of Bridged and Nonbridged N-Heterocycles by Cyclocondensation of Bis(Silyl Enol Ethers) with Iminium Salts.**2007**, (14), 2233-8.

Iminium salts, cyclization, with bis(silyl enol ethers), 123

**124.** Kirschning, A.; Kujat, C.; Luiken, S.; Schaumann, E. Small and Versatile - Formyl Anion and Dianion Equivalents.**2007**, (15), 2387-400.

**125.** Palomo, C.; Oiarbide, M.; Laso, A. Recent Advances in the Catalytic Asymmetric Nitroaldol (Henry) Reaction.**2007**, (16), 2561-74.

**126.** de Figueiredo, R. M.; Christmann, M. Organocatalytic Synthesis of Drugs and Bioactive Natural Products.**2007**, (16), 2575-600.

**127.** Li, G.; Saibau Kotti, S. R. S.; Timmons, C. Recent Development of Regio- and Stereoselective Aminohalogenation Reaction of Alkenes.**2007**, (17), 2745-58.

**128.** Shi, Y.-L.; Shi, M. Aza-Baylis-Hillman Reactions and Their Synthetic Applications.**2007**, (18), 2905-16.

**129.** Muzart, J. Procedures For and Possible Mechanisms of Pd-Catalyzed Allylations of Primary and Secondary Amines with Allylic Alcohols.**2007**, (19), 3077-89.

**130.** Beletskaya, I. P.; Ananikov, V. P. Unusual Influence of the Structures of Transition Metal Complexes on Catalytic C-S and C-Se Bond Formation Under Homogeneous and Heterogeneous Conditions.**2007**, (21), 3431-44.

**131.** Zanoni, G.; Pontiroli, A.; Marchetti, A.; Vidari, G. Stereoselective Carbonyl Allylation by Umpolung of Allylpalladium(II) Complexes.**2007**, (22), 3599-611.

**Heterocycles**

**132.** Tverdokhlebov, A. V. Pyrrolo[2,1-b]thiazoles.**2007**, *71*(4), 761-98.

**133.** Majhi, T. P.; Achari, B.; Chattopadhyay, P. Advances in the Synthesis and Biological Perspectives of Benzannulated Medium Ring Heterocycles.**2007**, *71*(5), 1011-52.

**134.** Jain, V. K.; Mandalia, H. C. The Chemistry of Calixpyrroles.**2007**, *71*(6), 1261-314.

**135.** Sliwa, W.; Peszke, J. Inclusion Complexes Containing Quaternary Azaaromatic Moieties.**2007**, *71*(8), 1685-713.

**136.** Itsikson, N. A.; Geide, I. V.; Morzherin, Y. Y.; Matern, A. I.; Chupakhin, O. N. Heteroditopic Receptors.**2007**, *72*, 53-77.

**Journal of Organometallic Chemistry**

**137.** Omae, I. Three Types of Reactions with Intramolecular Five-Membered Ring Compounds in Organic Synthesis.**2007**, *692*(13), 2608-32.

**138.** Klingebiel, U.; Matthes, C. From Lithium Halosilylamide to Small and Large Ring Compounds, Iminosilenes and Iminosilanes.**2007**, *692*(13), 2633-41.

**139.** Chivers, T.; Konu, J.; Ritch, J. S.; Copsey, M. C.; Eisler, D. J.; Tuononen, H. M. New Tellurium-Containing Ring Systems.**2007**, *692*(13), 2658-68.

**New Journal of Chemistry**

**140.** Balcells, D.; Maseras, F. Computational Approaches to Asymmetric Synthesis.**2007**, *31*(3), 333-43.

**141.** Mancin, F.; Tecilla, P. Zinc(II) Complexes as Hydrolytic Catalysts of Phosphate Diester Cleavage: From Model Substrates to Nucleic Acids.**2007**, *31*(6), 800-17.

**142.** Hahn, U.; Cardinali, F.; Nierengarten, J.-F. Supramolecular Chemistry for the Self-assembly of Fullerene-Rich Dendrimers.**2007**, *31*(7), 1128-38.

**143.** Andres, R.; De Jesus, E.; Flores, J. C. Catalysts Based on Palladium Dendrimers.**2007**, *31*(7), 1161-91.

**Organic Preparations and Procedures International**

**144.** Pace, A.; Buscemi, S.; Vivona, N. The Synthesis of Fluorinated Heteroaromatic Compounds. Part 2. Five-Membered Rings with Two Heteroatoms. A Review.**2006**, *39*(1), 1-70.

**145.** Paryzek, Z.; Skiera, I. Synthesis and Cleavage of Lactones and Thiolactones. Applications in Organic Synthesis. A Review.**2007**, *39*(3), 203-96.

**146.** Gallou, I. Unsymmetrical Ureas. Synthetic Methodologies and Application in Drug Design.**2007**, *39*(4), 355-83.

**Organometallics**

**147.** Balazs, G.; Gregoriades, L. J.; Scheer, M. Triple Bonds between Transition Metals and the Heavier Elements of Groups 14 and 15.**2007**, *26*(13), 3058-75.

**148.** Power, P. P. Bonding and Reactivity of Heavier Group 14 Element Alkyne Analogues.**2007**, *26*(18), 4362-72.

**149.** Gleiter, R.; Bleiholder, C.; Rominger, F. -Metallocenylmethylium Ions and Isoelectronic Fulvene Complexes of d6 to d9 Metals. Structural Considerations.**2007**, *26*(20), 4850-9.

**Pure and Applied Chemistry**

**150.** Moss, R. A.; Tian, J.; Chu, G.; Sauers, R. R.; Krogh-Jespersen, K. New Mechanisms Centered on Reactive Intermediates: Examples from Diazirine and Carbene Chemistry.**2007**, *79*(6), 993-1001.

**151.** Beletskaya, I. P.; Ananikov, V. P. Addition Reactions of E-E and E-H Bonds to Triple Bond of Alkynes Catalyzed by Pd, Pt, and Ni Complexes (E = S, Se).**2007**, *79*(6), 1041-56.

**152.** Chmielewski, M. J.; Zielinski, T.; Jurczak, J. Synthesis, Structure, and Complexing Properties of Macrocyclic Receptors for Anions.**2007**, *79*(6), 1087-96.

**153.** Paz, F. A. A.; Klinowski, J. Designing Novel Organic-Inorganic Frameworks.**2007**, *79*(6), 1097-110.

**154.** Garcia-Rio, L.; Leis, J. R.; Mejuto, J. C.; Perez-Lorenzo, M. Microemulsions as Microreactors in Physical Organic Chemistry.**2007**, *79*(6), 1111-23.

**155.** Kost, D.; Gostevskii, B.; Kalikhman, I. Silicon Rehybridization and Molecular Rearrangements in Hypercoordinate Silicon Dichelates.**2007**, *79*(6), 1125-34.

**156.** El Seoud, O. A. Solvation in Pure and Mixed Solvents: Some Recent Developments.**2007**, *79*(6), 1135-51.

**Russian Chemical Reviews**

**157.** Konstantinova, L. S.; Amelichev, S. A.; Rakitin, O. A. 1,2,3,4,5-Pentathiepins and 1,2,3,4,5-Pentathiepanes.**2007**, *76*(3), 195-211.

**158.** Samsoniya, S. A.; Trapaidze, M. V. The Chemistry of Indoloindoles.**2007**, *76*(4), 313-26.

**159.** Nifantyev, E. E.; Slitikov, P. V.; Rasadkina, E. N. Synthesis of Arylenephosphamacrocycles Using Tri- and Pentavalent Phosphorus Compounds.**2007**, *76*(4), 327-38.

**160.** Bagryansky, V. A.; Borovkov, V. I.; Molin, Y. N. Quantum Beats in Radical Pairs.**2007**, *76*(6), 493-506.

**Science**

**161.** Koshino, M.; Tanaka, T.; Solin, N.; Suenaga, K.; Isobe, H.; Nakamura, E. Imaging of Single Organic Molecules in Motion.**2007**, *316*(5826), 853.

**162.** Stuart, D. R.; Fagnou, K. The Catalytic Cross-Coupling of Unactivated Arenes.**2007**, *316*(5828), 1172-5.

**163.** Yan, S.; Wu, Y.-T.; Zhang, B.; Yue, X.-F.; Liu, K. Do Vibrational Excitations of CHD3 Preferentially Promote Reactivity Toward the Chlorine Atom?**2007**, *316*(5832), 1723-6.

**164.** Sabbah, H.; Biennier, L.; Sims, I. R.; Georgievskii, Y.; Klippenstein, S. J.; Smith, I. W. M. Understanding Reactivity at Very Low Temperatures: The Reactions of Oxygen Atoms with Alkenes.**2007**, *317*(5834), 102-5.

**165.** Melnick, J. G.; Parkin, G. Cleaving Mercury-Alkyl Bonds: A Functional Model for Mercury Detoxification by MerB.**2007**, *317*(5835), 225-7.

**166.** Iwasawa, T.; Hooley, R. J.; Rebek, J., Jr. Stabilization of Labile Carbonyl Addition Intermediates by a Synthetic Receptor.**2007**, *317*(5837), 493-6.

**167.** Hamilton, G. L.; Kang, E. J.; Mba, M.; Toste, F. D. A Powerful Chiral Counterion Strategy for Asymmetric Transition Metal Catalysis.**2007**, *317*(5837), 496-9.

**Synlett**

**168.** Suzuki, T.; Ohta, E.; Kawai, H.; Fujiwara, K.; Fukushima, T. Dynamic Redox Systems as Electrochromic Materials: Bistability and Advanced Response.**2007**, (6), 851-69.

**169.** Meggers, E.; Atilla-Gokcumen, G. E.; Bregman, H.; Maksimoska, J.; Mulcahy, S. P.; Pagano, N.; Williams, D. S. Exploring Chemical Space with Organometallics: Ruthenium Complexes as Protein Kinase Inhibitors. **2007**, (8), 1177-89.

**170.** Somfai, P.; Panknin, O. Investigations of the [2,3]-Sigmatropic Rearrangements of Vinylaziridines and Allylic Amines.**2007**, (8), 1190-202.

**171.** Hu, Q.-S. Controlling Competing Pathways in Palladium-Catalyzed Tandem/Domino Reactions of Hindered Grignard Reagents with 1,2-Dihaloarenes and 2-Haloaryl Tosylates.**2007**, (9), 1331-45.

**172.** Bertus, P.; Szymoniak, J. Titanium-Mediated Synthesis of Primary Cyclopropylamines from Nitriles and Grignard Reagents.**2007**, (9), 1346-56.

**173.** Walji, A. M.; MacMillan, D. W. C. Strategies to Bypass the Taxol Problem. Enantioselective Cascade Catalysis, A New Approach for the Efficient Construction of Molecular Complexity.**2007**, (10), 1477-89.

**174.** Woodward, S. Design Versus Discovery in Synthetic Applications of Organoalanes.**2007**, (10), 1490-500.

**175.** Oestreich, M. Silicon-Stereogenic Silanes in Asymmetric Catalysis.**2007**, (11), 1629-43.

**176.** Hall, D. G. Lewis and Bronsted Acid Catalyzed Allylboration of Carbonyl Compounds: from Discovery to Mechanism and Applications.**2007**, (11), 1644-55.

**177.** Rajca, A.; Rajca, S.; Pink, M.; Miyasaka, M. Annelated, Chiral -Conjugated Systems: Tetraphenylenes and Helical -Oligothiophenes.**2007**, (12), 1799-822.

**178.** Tanaka, K. Cationic Rhodium(I)/BINAP-Type Bisphosphine Complexes: Versatile New Catalysts for Highly Chemo-, Regio-, and Enantioselective [2+2+2] Cycloadditions.**2007**, (13), 1977-93.

**179.** Patil, N. T.; Yamamoto, Y. Palladium-Catalyzed Cascade Reactions of Highly Activated Olefins.**2007**, (13), 1994-2005.

**Synthesis-Stuttgart**

**180.** Gil, M. V.; Arevalo, M. J.; Lopez, O. Click Chemistry - What's in a Name? Triazole Synthesis and Beyond.**2007**, (11), 1589-620.

**181.** Auge, J.; Lubin-Germain, N.; Uziel, J. Recent Advances in Indium-Promoted Organic Reactions.**2007**, (12), 1739-64.

**182.** Hemeon, I.; Bennet, A. J. Sialic Acid and Structural Analogues: Stereoselective Syntheses.**2007**, (13), 1899-926.

**Tetrahedron**

**183.** Bellina, F.; Cauteruccio, S.; Rossi, R. Synthesis and Biological Activity of Vicinal Diaryl-Substituted 1H-Imidazoles.**2007**, *63*(22), 4571-624.

**184.** Hartley, R. C.; Li, J.; Main, C. A.; McKiernan, G. J. Titanium Carbenoid Reagents for Converting Carbonyl Groups into Alkenes.**2007**, *63*(23), 4825-64.

**185.** Lepore, S. D.; Mondal, D. Recent Advances in Heterolytic Nucleofugal Leaving Groups.**2007**, *63*(24), 5103-22.

**186.** Padwa, A.; Bur, S. K. The Domino Way to Heterocycles.**2007**, *63*(25), 5341-78.

**187.** Lenardao, E. J.; Botteselle, G. V.; De Azambuja, F.; Perin, G.; Jacob, R. G. Citronellal as Key Compound in Organic Synthesis.**2007**, *63*(29), 6671-712.

**188.** Polshettiwar, V.; Molnar, A. Silica-supported Pd Catalysts for Heck Coupling Reactions.**2007**, *63*(30), 6949-76.

**189.** Muzart, J. Aldehydes from Pd-Catalyzed Oxidation of Terminal Olefins.**2007**, *63*(32), 7505-21.

**190.** Druzhinin, S. V.; Balenkova, E. S.; Nenajdenko, V. G. Recent Advances in the Chemistry of ,-Unsaturated Trifluoromethylketones.**2007**, *63*(33), 7753-808.

**191.** Wagner, F. F.; Comins, D. L. Recent Advances in the Synthesis of Nicotine and its Derivatives.**2007**, *63*(34), 8065-82.

**192.** Yamamoto, H. New Reaction and New Catalyst - A Personal Perspective.**2007**, *63*(35), 8377-412.

**193.** Popowycz, F.; Merour, J.-Y.; Joseph, B. Synthesis and Reactivity of 4-, 5- and 6-Azaindoles.**2007**, *63*(36), 8689-707.

**194.** Taylor, C. M.; Wang, W. Histidinoalanine: A Crosslinking Amino Acid.**2007**, *63*(37), 9033-47.

**Topics in Current Chemistry**

**195.** Wannberg, J.; Ersmark, K.; Larhed, M. Microwave-Accelerated Synthesis of Protease Inhibitors.**2006**, *266*(Microwave Methods in Organic Synthesis), 167-98.

**196.** Haase, C.; Seitz, O. Chemical Synthesis of Glycopeptides.**2007**, *267*(Glycopeptides and Glycoproteins), 1-36.

**197.** Thayer, D. A.; Wong, C.-H. Enzymatic Synthesis of Glycopeptides and Glycoproteins.**2007**, *267*, 37-63.

**198.** Meyer, B.; Moeller, H. Conformation of Glycopeptides and Glycoproteins.**2007**, *267*, 187-251.

**199.** Fischer, D.; Geyer, A. NMR Analysis of Bioprotective Sugars: Sucrose and Oligomeric (1  2)--D-Glucopyranosyl-(1  2)--D-Fructofuranosides.**2007**, *272*(Bioactive Conformation I), 169-85.

**200.** Bur, S. K. 1,3-Sulfur Shifts: Mechanism and Synthetic Utility.**2007**, *274*(Characterization I), 125-71.

**201.** Reggelin, M. [2,3]-Sigmatropic Rearrangements of Allylic Sulfur Compounds.**2007**, *275*(Sulfur-Mediated Rearrangements II), 1-65.

**202.** Braverman, S.; Cherkinsky, M. [2,3]Sigmatropic Rearrangements of Propargylic and Allenic Systems.**2007**, *275*, 67-101.

**203.** Fernandez de la Pradilla, R.; Tortosa, M.; Viso, A. Sulfur Participation in [3,3]-Sigmatropic Rearrangements.**2007**, *275*, 103-29.

**204.** Zonta, C.; De Lucchi, O.; Volpicelli, R.; Cotarca, L. Thione-Thiol Rearrangement: Miyazaki-Newman-Kwart Rearrangement and Others.**2007**, *275*, 131-61.

**205.** Plesniak, K.; Zarecki, A.; Wicha, J. The Smiles Rearrangement and the Julia-Kocienski Olefination Reaction.**2007**, *275*, 163-250.

**206.** Kuhn, L. T.; Bargon, J. Transfer of Parahydrogen-Induced Hyperpolarization to Heteronuclei.**2007**, *276*(In Situ NMR Methods in Catalysis), 25-68.

**207.** Greiner, L.; Laue, S.; Woeltinger, J.; Liese, A. Continuous Asymmetric Hydrogenation.**2007**, *276*, 111-24.

**208.** Kuhn, L. T.; Bargon, J. Exploiting Nuclear Spin Polarization to Investigate Free Radical Reactions via in situ NMR.**2007**, *276*, 125-54.

**Monographs**

**209.** Allen, D. W.; Tebby, J. C.; Eds. Specialist Periodical Reports. [In: *Organophosphorus Chem*., **2007**; *36*]. Royal Society of Chemistry: Cambridge, U.K., 2007.

**210.** Arnold, S. V.; Ed. Chemical Physics Research Trends. Nova Science: Hauppauge, NY, 2007.

**211.** Bachrach, S. M. Computational Organic Chemistry. John Wiley & Sons: Hoboken, NJ, 2007.

**212.** Davies, J. S. Amino Acids, Peptides and Proteins, Vol. 35. Royal Society of Chemistry: Cambridge, U.K., 2006.

**213.** Denisov, E. T.; Afanas'ev, I. B.; Eds. Oxidation and Antioxidants in Organic Chemistry and Biology. CRC Press: Boca Raton, Florida, 2005.

**214.** Fassina, G.; Miertus, S.; Eds. Combinatorial Chemistry and Technologies: Methods and Applications, Second Edition. CRC Press: Boca Raton, Florida, 2005.

**215.** Hall, D. G.; Ed. Boronic Acids: Preparation and Applications in Organic Synthesis and Medicine. Wiley-VCH: Weinheim, Germany, 2005.

**216.** Kurti, L.; Czako, B.; Eds. Strategic Applications of Named Reactions in Organic Synthesis. Academic Press: Burlington, MA, 2005.

**217.** Laali, K. K.; Ed. Recent Developments in Carbocation and Onium Ion Chemistry. American Chemical Society: Washington, DC, 2007.

**218.** Landgrebe, J. A.; Ed. Theory and Practice in the Organic Laboratory: With Microscale and Standard Scale Experiments; 5th Edition. Thomson/Wadsworth: Belmont, CA, 2005.

**219.** Li, J. J.; Ed. Name Reactions for Functional Group Transformations. John Wiley: Hoboken, NJ, 2007.

**220.** Lindstrom, U. M.; Ed. Organic Reactions in Water: Principles, Strategies and Applications. Blackwell Publishing: Oxford, U.K., 2007.

**221.** Meyer, F.; Limberg, C.; Eds. Organometallic Oxidation Catalysis. [In: *Top. Organomet. Chem.*, **2007**; 22]. Springer: Berlin, Germany, 2007.

**222.** Mikami, K.; Lautens, M.; Eds. New Frontiers in Asymmetric Catalysis. John Wiley & Sons: Hoboken, NJ, 2007.

**223.** Mueller, T. J. J.; Bunz, U. H. F.; Eds. Functional Organic Materials: Syntheses, Strategies and Applications. Wiley-VCH: Weinheim, Germany, 2007.

**224.** Nikolaev, A. V.; Backinowsky, L.; Defaye, J.; Eds. Special Issue: Synthesis and Structure of Glycans. [In: Carbohydr. Res., 2007; 342(3-4)]. Elsevier: Amsterdam, Netherlands**, 2007.**

**225.** Overman, L. E.; Ed. Organic Reactions, Vol. 68. John Wiley & Sons, Inc., Hoboken, N. J., 2007.

**226.** Pirrung, M. C.; Ed. The Synthetic Organic Chemists' Companion. John Wiley & Sons: Hoboken, NJ, 2007.

**227.** Richard, J. P.; Ed. Advances in Physical Organic Chemistry, Vol. 41. Elsevier: San Diego, CA, 2006.

**228.** Sherma, J.; Fried, B.; Eds. Special Issue: Thin Layer Chromatography. [In: *J. Liq. Chromatogr. Relat. Technol.,* **2007**; *30*(15)]. Taylor & Francis: Philadelphia, PA, 2007.

**229.** Sykstra, C.; Thakkar, A. J.; Eds. Special Issue: Computational Organic Chemistry. [In: *Theochem*., **2007**; *811*(1-3)]. Elsevier: Amsterdam, Netherlands, 2007.

**230.** Toniolo, C.; Bruckner, H.; Eds. Topical Issue Peptaibiotics. [In: *Chem. Biodiversity,* **2007**; *4*(6)]. Helvetica Chimica Acta: Zurich, Germany, 2007.

**231.** Tundo, P.; Perosa, A.; Zecchini, F.; Eds. Methods and Reagents for Green Chemistry. John Wiley & Sons: Hoboken, NJ, 2007.

**232.** Warriner, S. L.; Ed. Sciences of Synthesis. Compounds with Two Carbon - Heteratom Bonds. Georg Thieme Verlag: Stuttgart, Germany, 2007.

**233.** Wipf, P.; Ed. Handbook of Reagents for Organic Synthesis: Reagents for High-Throughput Solid-Phase and Solution-Phase Organic Synthesis. John Wiley & Sons: Chichester, U.K., 2005.

**234.** Yudin, A.; Ed. Aziridines and Epoxides in Organic Synthesis. Wiley-VCH: Weinheim, Germany, 2006.

**235.** Zaikov, G. E.; Kozlov, G. V.; Makitra, R. G.; Eds. Theoretical and Practical Guide to Organic Physical Chemistry. Nova Science: Hauppauge, NY, 2006.

**236.** Zaikov, G. E.; Rakovsky, S. K.; Schiraldi, D. A.; Eds. Diversity in Chemical Reactions: Pure and Applied Chemistry. Nova Science: Hauppauge, NY, 2006.

**Index**

Acetylcholinesterase reactivators, 106

Acetylenes, with sulfonyl azides, 83

Acetylindoles, N-, benzene cross-coupling, 162

Acylpyrazoles, Diels-Alderases, 11

Aldehydes, from terminal alkenes, 189

Alkaloids, cyanobacterial, 28

cyclotryptamine, 27

Alkenes, aldehyde condensation, 112

aminohalogenation, 127

cascade reactions, 179

from carbonyls, Ti carbenoids, 184

Pt activation, 19

with O(3P), low temperatures, 164

Alkynes, analogs, group 14, 148

hydroamination, 74

reaction with sulfur, 151

selenol addition, 130

thiol addition, 130

Allylboration, of carbonyls, 176

Allylpalladium, umpolung reactions, 131

Amines, allylation, 129

allylic, [2,3]-sigmatropic rearrangement, 170

with allylic alcohols, 129

Amino acids, book, 212

, unnatural, 110

Aminocarbasugars, 38

Aminopalladation, of alkenes, 63

Anilines, direct synthesis, 14

from aldehydes, 82

Annulenes, 4

Annulenylenes, 4

Annulynes, 4

Anticancer agents, 67

encapsulation, 31

Anti-influenza agents, 84

Antioxidants, book, 213

carbon radicals, 25

Aqueous organic reactions, book, 220

Aromatic metallacycles, 10

Aromatic ring dislocation, 205

Aromatic thiols, from phenols, 204

Aromatics, catalytic cross-coupling, 162

chloronitro, 107

Arylenephosphamacrocycles, 159

Asymmetric catalysis, book, 222

Axaindoles, synthesis, 61

Azaaromatics, quaternary, inclusion complexes, 135

Aza-Baylis-Hillman reaction, 128

Azabenzonorbornadienes, 9

Azabicyclic alkenes, 9

Azaindoles, 193

Azaphospholes, anellated, 101

Azine biaryls, 56

Azine organometallics, -electron deficient, 56

Aziridines, book, 234

click chemistry, 180

from diazocarbonyls, 105

substituted, 40

Benzobicyclononanones, 123

Benzofurans, with Cu/Rh carbenoids, 60

Benzynes, 18

Bestatin, synthesis, 109

Bioprotectants, sugar, NMR, 199

Bis(imines), 37

Bis(imino)pyridines, 37

Bisoxazolinyl-phenyl pincers, 62

Bisselenation, 130

Bisthiolation, 130

Boronic acids, book, 215

Bronsted acids, combined with Lewis acids, 192

Butane-1,4-diyl dications, 168

Butylphenylthiophosphinic acid, tertiary, 99

Calixarenes, inclusion complexes, 135

Calixpyrroles, 134

N-confused, 86

Carbamates, via carbon dioxide, 113, 120

Carbaoligosaccharides, 38

Carbasugars, 38

Carbenes, intermediates, 150

N-heterocyclic, 15, 88, 94

N-heterocyclic, Ag complexes, 90

N-heterocyclic, chelating, 93

N-heterocyclic, organocatalysts, 12

N-heterocyclic, pincer ligands, 89

N-heterocyclic, Ru complexes, 91

Carbenoids, from diazocarbonyls, 105

Carbocations, book, 217

Carbon-transition metal double bond, 96

Carbonyl allylation, allylic borates, 176

allylpalladium, 131

Carboxylate leaving groups, 185

C-H bond coupling constants, 8

Chemical physics, book, 210

Chiral anionic counterions, 167

Chiral counterions, Au complexes, 167

Chlorine, vibrational energy, 163

Chloronitroanilines, from chloronitrobenzene, 107

Citronellal, 187

Click chemistry, 70

Combinatorial chemistry, book, 214

Computational chemistry, asymmetric synthesis, 140

Computational organic chemistry, 229

book, 211

Coordination frameworks, 153

Crown ethers, siloxane-, 21

Cryptands, siloxane, 21

Cucurbituril, 31

inclusion complexes, 135

Cycloadditions, 1,3-dipolar, 180

[2+2+2], 178

Cyclodextrins, inclusion complexes, 135

Cyclopentenone prostaglandins, 48

Cyclopentenones, synthesis, 172

Cyclopentenylamines, synthesis, 172

Cyclopropenes, transition metal catalysis, 45

Cyclopropylamines, from nitriles and organomagnesium, 172

Dearomatization, nucleophilic, 36

Dendrimers, Pd, 143

Density functional theory, 20

Deprotection, cerium ammonium nitrate, 1

Diaminopimelate biosynthesis, 33

Diazirinone, 150

Dichlorocarbenes, 150

Dichlorodiazirine, 150

Diels-Alderases, 11

Digermynes, 148

Dihaloarenes, Grignard reagents, tandem reactions, 171

Dihydrofurans, from diazocarbonyls, 105

Dinitrogen bond activation, 13

Dioxiranes, heteroatom, 47

tetrahedral, 47

trigonal bipyramidal, 47

Dipicolinic macrocyclic receptors, 152

Diselenide bonds, alkyne addition, 151

Distannynes, 148

Disulfide bonds, alkyne addition, 151

Domino reactions, heterocycle synthesis, 186

Electronic circular dichroism, 52

Electron-transfer, structural change reactions, 76

Enantiophilic molecules, 53

Enantiophobic molecules, 53

Encapsulation, 29

Enediynes. 44

Epoxides, book, 234

click chemistry, 180

Ethylene ologomerization, 97

Five-membered rings, 137

Formyl anions, 124

Fullerene dendrimers, 142

Functional organic materials, book, 223

Functional transformations, book, 219

Furans, with Cu/Rh carbenoids, 60

Gibbs energies, solvent transfer, 51

Glycans, 224

Glycoluril, with formaldehyde, 31

Glycopeptides, conformation, 198

enzymatic synthesis, 197

sugar-assisted ligation, 77

synthesis, 196

Glycoproteins, conformation, 198

enzymatic synthesis, 197

synthesis, 68

Glycosides, thio, 98

Gold catalysts, 16, 46

Green chemistry, asymmetric, 41

book, 231

phosphorus, 104

Grignard reagents, heavy alkaline earth, 78

Haloaryl tosylates, Grignard reagents, tandem reactions, 171

Halogen dance reactions, 55

Heck coupling, with supported Pd, 188

Helicenes, 177

Hemiaminal intermediates, encapsulation, 166

Henry reaction, enantioselective, 125

Heteroaromatics, fluoro, 5-membered rings, 144

functionalization, 66

Heterocycles, benzannulated, 133

carbon nucleophiles, 111

from alkenes, with Cu, 64

from arenes, with Cu, 64

halogenated, functionalization, 54

N-, bridged, 123

nitrogen, functionalization, 57

via carbenoid transfer, 105

via CO, 17

via multicomponent synthesis, 59

via Pd, Rh, Ru, Cu, 59

Hexaphenylethane, dynamic redox system, 168

Histidinoalanine, 194

Hydrogenation, continuous, 207

Hydroperoxides, heterocyclic, 49

Hydroselenation, 130

Hydrothiolation, 130

Imidazoles, diaryl, 183

Iminosilanes, 138

Iminosilenes, 138

Indium catalysts, 181

Indoles, via Rh catalysts, 119

with Cu/Rh carbenoids, 60

Indoloindoles, 158

Ionic liquids, 30, 42, 104

Iridacycles, aromatic, 10

Isophthalamide macrocyclic receptors, 152

Julia-Kocienski olefination, 205

Ketene imine intermediates, 83

Lactones, 145

Lewis acids, combined with transition metals, 73

Al, B, Sn, in new syntheses, 192

Ligands, natural bite angle, 34

Lithiumhalosilylamides, 138

Low temperature reactions, 164

Lysine biosynthesis, 33

Manganese acetate, 121

Metal-alkenyl complexes, 97

Metallacycloalkenes, via ring closing metathesis, 97

Metallocenes, 87

Metallocenophanes, strained, 24

Metallocenylmethylium ions, 149

Metallopolymers, 24

Microemulsions, 154

Microscale organic labs, book, 218

Microwaves, protein inhibotor synthesis, 195

Miyazaki-Newman-Kwart rearrangement, 204

Moenomycin, synthesis, 23

Molecular containers, self-assembled, 29

Molecular wires, 80

Morita-Baylis-Hillman reaction, 22

Named reactions, book, 216

Natural product synthesis, organocatalytic, 126

Nicotine, synthesis, 191

Nitoaldol reaction, enantioselective, 125

Nitrobenzene-water system, 6

NMR, natural products, 50

NMR, in situ, 206-8

free radicals, 208

Oligothiophenes, 177

Onium ions, book, 217

Organoalanes, 174

Organoaluminum, with aldehydes, 174

with allylic halides, 174

Organoindium catalysts, 181

Organomercury, detoxification, 165

Organometallic oxidation catalysis, book, 221

Organophosphorus chemistry, 209

Oseltamivir synthesis, 84

Osmium-carbon double bonds, 92

Oxabicyclic alkenes, 9

Oxazolidin-2-one ring, 117

Oxazolones, 75

Oxidation, book, 213

Oxobenzonorbornadienes, 9

Palladium compounds, 2-amino alkyl-, 63

Pentathiepanes, 157

Peptaibiotics, 230

Peptides, nanostructures, 71

Peptidomimetics, piperidine, 114

pyranose, 114

Perchlorates, 122

Phenols, cyclophosphorylation, 159

direct synthesis, 14

Phenylacetaldehyde, from styrene, 189

Phosphamethine cyanine dyes, 95

Phosphate diester bond cleavage, 141

Phosphetanes, 103

Phosphide anions, 95

Phosphinanes, 103

Phosphines, chiral heterocyclic, 103

secondary, 116

t-butyl, 99

tertiary, 116

Phosphinidenes, 95

Phosphiranes, 103

Phospholes, 103

Phosphopeptides, 108

Phosphorus ligands, 102

Phosphozirconocenes, 102

Photocatalysis, C-C bond formation, 43

Physical organic chemistry, book, 227, 235

Pincer ligands, 62

Platinum catalysts, 16

Pnictaalkenes, 95

Polyhalomethanes, 39

Prins reaction, 112

Propargyl sulfonium ylides, rearrangements, 202

Prostacyclins, 48

Prostaglandins, 48

Protease inhibitors, microwave synthesis, 195

Protecting groups, amphoteric molecules, 79

Protein glycosylation, 196

Protein phosphorylation, 108

Proteins, glycosylation, 198

Pyridine, 2-carbene, 15

hetero-, metalation, 65

hetero, substitution, 65

via [2+2+2] cycloaddition, 58

Pyrroles, from diazocarbonyls, 105

N-confused calix[4]pyrroles, 86

with Cu/Rh carbenoids, 60

Pyrrolidines, via aminopalladation of alkenes, 63

Pyrrolopyridines, synthesis, 61

Pyrrolothiazoles, 132

Radicals, carbon-centered, 25

short-lived, in liquid solutions, 160

Reagents, solid phase, book, 233

Rearrangements, with sulfur, 201-5

Receptors, heteroditopic, 136

macrocyclic, for anions, 152

Redox systmes, dynamic, 168

Resolution, spontaneous, 53

Rhenium complexes, catalysts, 118

Rhodium, BINAP biphosphine complexes, 178

Ring-closing metathesis, sterically hindered, 85

RNA synthesis, automated, 35

Ruthenium complexes, protein kinase inhibitors, 169

Selenoamides, heterocycle synthesis, 115

Sialic Acid, 182

Silanes, Si-stereogenic, 175

Silicon dichelates, 155

Silylene complexes, 5

Silylene ligands, 5

Solid state organic reactions, with metals, 69

Solvatochromism, 156

Steroids, host-guest assemblies, 3

Styrene, Wacker oxidation, 189

Sulfonate leaving groups, 185

Sulfones, from dienes, 7

Sulfur dioxide, 7

Sulfur shifts, 200

Sulfur, catalysts, rearrangements, 205

Sultams, bridgehead, unsaturated, 81

Sultines, from 1,3-dienes, 7

Suzuki catalysts, hemilabile ligands, 2

Synthesis, book, 226

two heteroatoms, book, 232

Tamiflu synthesis, 84

Tandem reactions, transmetalation, 171

Taxol, cascade reactions, 173

Tellurium ligands, 139

Telluroamides, heterocycle synthesis, 115

Tetracyanoanthraquinodimethane (TCAQ), 72

Tetraphenylenes, 177

Thin layer chromatography, 228

Thioamides, heterocycle synthesis, 115

Thiocarbonylthio transfer, 32

Thio-Claisen rearrangement, 203

Thiolactones, 145

Thione-thiol rearrangement, 204

Thiooligosaccharides, 98

Titanium carbenoids, 184

Transition metals, triple bonds, 147

Transmission electron microscopy, hydrocarbon chain, 161

Triarylphosphines, 100

Trifluoromethylketones, unsaturated, 190

Triphosphenium salts, 95

Tropinones, synthesis, 123

Ultrasound, benzocyclobutene polymers, 26

Ureas, unsymmetric, 146

Vinyl selenides, 130

Vinyl sulfides, 130

Vinylaziridines, [2,3]-sigmatropic rearrangement, 170

Xanthates, transfer, 32

Zirconium reagents, P ligands, 102

Zirconocenes, phosphorus ligands, 102
